# Supplementary material for: Clinical Outcomes of 217 Patients with Acute Erythroleukemia According to Treatment Type and Line: A Retrospective Multinational Study
Source: MDPI journal article supplement (doi:10.3390/ijms18040837), 2017-04-14
Supplement: s1 [file s1]

# Supplementary File

**Table S1.** Observed progression-free survival.

|                                        | <i>n</i><br>Patients | <i>n</i><br>Events | Median PFS,<br>mo<br>(95% CI) | One-Year PFS,<br>%<br>(95% CI) |
|----------------------------------------|----------------------|--------------------|-------------------------------|--------------------------------|
| Total treated cohort <sup>1</sup>      | 177                  | 139                | 7.1<br>(6.3-9.4)              | 35.6<br>(28.7-44.0)            |
| HMA all lines <sup>2</sup>             | 74                   | 65                 | 5.1<br>(3.4-9.2)              | 26.9<br>(18.2-39.6)            |
| HMA ≥2 <sup>nd</sup> line <sup>3</sup> | 33                   | 31                 | 3.4<br>(2.0-6.3)              | 12.6%<br>(5.0-31.5)            |
| HMA 1 <sup>st</sup> line <sup>4</sup>  | 39                   | 32                 | 9.4<br>(4.2-14.5)             | 40.6<br>(27.3-60.2)            |
| ICT 1st line <sup>5</sup>              | 103                  | 74                 | 8.0<br>(6.9-14.5)             | 41.8<br>(32.5-53.7)            |

<sup>1</sup> Includes HMA 1<sup>st</sup> line, HMA ≥ 2<sup>nd</sup> line, and ICT 1<sup>st</sup> line;

<sup>2</sup> Data on PFS was not available for *n* = 14 patients;

<sup>3</sup> Data on PFS was not available for *n* = 12 patients;

<sup>4</sup> Data on PFS was not available for *n* = 2 patients;

<sup>5</sup> Data on PFS was not available for *n* = 19 patients.

**Table S2.** Observed overall survival in the overall sample and in treatment subgroups.

|                                          | <i>n</i><br>Patients | <i>n</i><br>Events | Median OS, mo<br>(95% CI) | One-Year<br>Survival, %<br>(95% CI) |
|------------------------------------------|----------------------|--------------------|---------------------------|-------------------------------------|
| Total treated cohort <sup>1</sup>        | 205                  | 142                | 11.1<br>(9.8-14.3)        | 49.1<br>(42.2-57.2)                 |
| HMA all lines <sup>2</sup>               | 84                   | 58                 | 12.3<br>(9.8-14.3)        | 52.5<br>(42.1-65.5)                 |
| HMA ≥2 <sup>nd</sup> line <sup>3,*</sup> | 41                   | 28                 | 9.8<br>(4.6-13.5)         | 38.0<br>(24.2-59.6)                 |
| HMA 1 <sup>st</sup> line <sup>4,*</sup>  | 41                   | 29                 | 13.7<br>(12.3-20.5)       | 65.8<br>(52.2-82.9)                 |
| ICT 1st line <sup>5</sup>                | 121                  | 84                 | 10.5<br>(9.1-20.0)        | 46.7<br>(37.9-57.5)                 |

<sup>1</sup> Includes HMA 1<sup>st</sup> line, HMA ≥ 2<sup>nd</sup> line, and ICT 1<sup>st</sup> line;

<sup>2</sup> Data on OS was not available for *n* = 4 patients;

<sup>3</sup> Data on OS was not available for *n* = 1 patient;

<sup>4</sup> Data on OS was not available for *n* = 1 patient;

<sup>5</sup> Data on OS was not available for *n* = 1 patient;

\* Data on line of treatment was not available for *n* = 2 patients.

**Table S3.** Distribution of causes of death by treatment group (censored at BMT).

| Cause of Death                  | HMA<br>( <i>n</i> =84 <sup>1</sup> ) | ICT (3+7)<br>( <i>n</i> =121 <sup>2</sup> ) | <i>p</i> -Value<br>(Chi-Square-Test) |
|---------------------------------|--------------------------------------|---------------------------------------------|--------------------------------------|
| AML progression, <i>n/n</i> (%) | 31/58 (53)                           | 55/84 (65)                                  | 0.269                                |
| Infection, <i>n/n</i> (%)       | 10/58 (17)                           | 11/84 (13)                                  | 0.465                                |
| Others, <i>n/n</i> (%)          | 6/58 (10)                            | 6/84 (7)                                    | 0.467                                |
| Unknown, <i>n/n</i> (%)         | 11/58 (19)                           | 12/84 (14)                                  | 0.384                                |
| Total deaths, <i>n/n</i> (%)    | 58/84 (69)                           | 84/121 (69)                                 | 1                                    |

<sup>1</sup> Survival Data was not available for *n* = 4 patients. <sup>2</sup> Survival Data was not available for *n* = 1 patient.
